# Supplementary material for: Structural validation of the Self-Compassion Scale with a German general population sample
Source: PubMed Central journal article supplement (PMC5800544; doi:10.1371/journal.pone.0190771), 2018-02-06
Supplement: pone.0190771.s001.pdf [file pone.0190771.s001.pdf]

Factorial Validation of the Self Compassion Scale

S 1: Summary of results from factor analytic studies assessing the structure of the Self-Compassion Scale

| Study              | Sample/size                           | Language | Analysis | Factors Tested                                                                                                             | Reported Model fit Indices                                          | Reported Model Fit Qualifiers <sup>+</sup> | Reported Criteria for Adequate Model Fit                                               |
|--------------------|---------------------------------------|----------|----------|----------------------------------------------------------------------------------------------------------------------------|---------------------------------------------------------------------|--------------------------------------------|----------------------------------------------------------------------------------------|
| Neff, 2003<br>[12] | University students<br>(n=391)        | English  | CFA      | 1F                                                                                                                         | CFI=.84, NNFI=.80 (self-kindness and self-judgment items)           | Poor fit                                   | Not reported                                                                           |
|                    |                                       |          |          | 1F                                                                                                                         | CFI=.59, NNFI=.43 (common humanity and isolation items)             | Poor fit                                   |                                                                                        |
|                    |                                       |          |          | 1F                                                                                                                         | CFI=.83, NNFI=.75 (mindfulness and over-identification items)       | Poor fit                                   |                                                                                        |
|                    |                                       |          |          | 2F                                                                                                                         | CFI=.91, NNFI=.88 (self-kindness/self-judgment)                     | Adequate fit                               |                                                                                        |
|                    |                                       |          |          | 2F                                                                                                                         | CFI=.99, NNFI=.99 (common humanity /isolation)                      | Adequate fit                               |                                                                                        |
|                    |                                       |          |          | 2F                                                                                                                         | CFI=.96, NNFI=.94 (mindfulness/over-identification)                 | Adequate fit                               |                                                                                        |
|                    |                                       |          |          | 6F<br>Second order (6>1)                                                                                                   | CFI=.91, NNFI=.90<br>CFI=.90, NNFI=.88                              | Adequate fit<br>Acceptable fit             |                                                                                        |
| Neff, 2017<br>[23] | Students<br>(n=222)                   | English  | CFA      | 1F                                                                                                                         | RMSEA=.09, SRMR=.08, CFI=.79, TLI=.77, AIC=14438.04                 | Poor fit                                   | CFI, TLI ≥ .90;<br>RMSEA, SRMR ≤<br>.10, AIC                                           |
|                    |                                       |          |          | 2F                                                                                                                         | RMSEA=.07, SRMR=.06, CFI=.88, TLI=.87, AIC=14191.63                 | Poor fit                                   |                                                                                        |
|                    |                                       |          |          | 6F                                                                                                                         | RMSEA=.05, SRMR=.05, CFI=.93, TLI=.92, AIC=14047.81                 | Adequate fit                               |                                                                                        |
|                    |                                       |          |          | Second order (6>1)                                                                                                         | RMSEA=.07, SRMR=.07, CFI=.89, TLI=.88, AIC=.14153.43                | Poor fit                                   |                                                                                        |
|                    |                                       |          |          | Bifactor (6>1)                                                                                                             | RMSEA=.06, SRMR=.06, CFI=.91, TLI=.89, AIC=14098.65, ω= .95, ωH=.90 | Adequate fit                               |                                                                                        |
|                    | MTurk-recruited<br>sample<br>(N=1394) | English  | CFA      | 1F                                                                                                                         | RMSEA=.10, SRMR=.08, CFI=.74, TLI=.72, AIC=100063.94                | Poor fit                                   | Omega and omega-<br>h coefficients, for<br>bifactor models<br>[cutoff not<br>reported] |
|                    |                                       |          |          | 2F                                                                                                                         | RMSEA=.07, SRMR=.05, CFI=.88, TLI=.87, AIC=97446.58                 | Poor fit                                   |                                                                                        |
|                    |                                       |          |          | 6F                                                                                                                         | RMSEA=.05, SRMR=.04, CFI=.94, TLI=.93, AIC=96229.10                 | Adequate fit                               |                                                                                        |
|                    |                                       |          |          | Second order (6>1)                                                                                                         | RMSEA=.06, SRMR=.08, CFI=.89 TLI=.88, AIC=97214.10                  | Poor fit                                   |                                                                                        |
|                    |                                       |          |          | Bifactor (6>1)                                                                                                             | RMSEA=.06, SRMR=.07, CFI=.91, TLI=.89, AIC=96823.54, ω= .95, ωH=.89 | Adequate fit                               |                                                                                        |
|                    | Meditators<br>(N=215)                 | English  | CFA      | 1F                                                                                                                         | RMSEA=.11, SRMR=.09, CFI=.74, TLI=.72, AIC=12651.00                 | Poor fit                                   |                                                                                        |
|                    |                                       |          |          | 2F                                                                                                                         | RMSEA=.08, SRMR=.06, CFI=.87, TLI=.86, AIC=12258.42                 | Poor fit                                   |                                                                                        |
|                    |                                       |          |          | 6F                                                                                                                         | RMSEA=.06, SRMR=.06, CFI=.93, TLI=.92, AIC=12071.63                 | Adequate fit                               |                                                                                        |
|                    |                                       |          |          | Second order (6>1)                                                                                                         | RMSEA=.07, SRMR=.08, CFI=.89, TLI=.88, AIC=12190.95                 | Poor fit                                   |                                                                                        |
|                    |                                       |          |          | Bifactor (6>1)                                                                                                             | RMSEA=.07, SRMR=.07, CFI=.91, TLI=.90, AIC=12115.61, ω= .96, ωH=.90 | Adequate fit                               |                                                                                        |
|                    | Clinical sample<br>(N=390)            | English  | CFA      | 1F                                                                                                                         |                                                                     | Poor fit                                   |                                                                                        |
| 2F                 |                                       |          |          | RMSEA=.11, SRMR=.10, CFI=.64, TLI=.61, AIC=28263.28                                                                        | Poor fit                                                            |                                            |                                                                                        |
| 6F                 |                                       |          |          | RMSEA=.08, SRMR=.07, CFI=.83, TLI=.82, AIC=27495.59                                                                        | Poor fit                                                            |                                            |                                                                                        |
| Second order (6>1) |                                       |          |          | RMSEA=.07, SRMR=.06, CFI=.88, TLI=.87, AIC=27307.50                                                                        | Poor fit                                                            |                                            |                                                                                        |
| Bifactor (6>1)     |                                       |          |          | RMSEA=.09, SRMR=.10, CFI=.80, TLI=.78, AIC=27639.30<br>RMSEA=.08, SRMR=.09, CFI=.84, TLI=.81, AIC=27474.55, ω= .94, ωH=.85 | Poor fit<br>Poor fit                                                |                                            |                                                                                        |

## Factorial Validation of the Self Compassion Scale

|                         |                                                  |                |            |                                      |                                                                                                                                                                                                                               |                                                  |                                                                                                                   |
|-------------------------|--------------------------------------------------|----------------|------------|--------------------------------------|-------------------------------------------------------------------------------------------------------------------------------------------------------------------------------------------------------------------------------|--------------------------------------------------|-------------------------------------------------------------------------------------------------------------------|
| Hupfeld, 2011<br>[18]   | Psychologically minded adults<br>(n=561)         | German         | ESEM       | 2F<br>3F<br>6F                       | X <sup>2</sup> =1154.91, p<.01, RMSEA=.08, SRMR=.06, CFI=.82<br>X <sup>2</sup> =835.45, p<.01, RMSEA=.07, SRMR=.05, CFI=.88<br>X <sup>2</sup> =280.98, p<.01, RMSEA=.031, SRMR=.019, CFI=.98                                  | Poor fit<br>Acceptable fit<br>Adequate fit       | Not reported, but references provided [54]                                                                        |
|                         |                                                  |                | CFA        | 2F<br>3F<br>6F<br>Second order (6>1) | Not reported<br>Not reported<br>X <sup>2</sup> =961.73, p<.01, RMSEA=.065, SRMR=.064, CFI=.86<br>X <sup>2</sup> =1258.56, p<.01, RMSEA=.077, SRMR=.081, CFI=.83                                                               | Poor<br>Poor<br>Acceptable fit<br>Acceptable fit | Not reported, but references provided [54]                                                                        |
| Petrocchi, 2014<br>[19] | Adults recruited online<br>(n=424; 40% students) | Italian        | CFA        | 1F<br>2F<br>6F<br>Second order (6>1) | Not reported<br>Not reported<br>X <sup>2</sup> =320.28, p<.001, RMSEA=.08, SRMR=.07, TLI=.97, CFI=.90<br>Not reported                                                                                                         | Poor fit<br>Poor fit<br>Adequate fit<br>Poor fit | CFI, TLI ≥ .90;<br>0.5 ≤ RMSEA ≤ .08<br>SRMR ≤ .08                                                                |
| Garcia-Campayo<br>[17]  | College (health science) students<br>(n=268)     | Spanish        | CFA        | 6F                                   | X <sup>2</sup> = not reported; RMSEA=.06, SRMR=.05; CFI=.95; GFI=.93                                                                                                                                                          | Adequate fit                                     | CFI, GFI > .90;<br>SRMR, RMSEA < .08                                                                              |
| Williams, 2014<br>[20]  | Convenience sample<br>(n=821)                    | English/<br>UK | CFA        | 1F<br>6F<br>Second order (6>1)       | X <sup>2</sup> =3937.49, p<.001, RMSEA=.12, SRMR=.10, CFI=.68, NNFI=.65<br>X <sup>2</sup> =1472.68, p<.001, RMSEA=.07, SRMR=.06, CFI=.90, NNFI=.88<br>X <sup>2</sup> =2142.74, p<.001, RMSEA=.09, SRMR=.09, CFI=.84, NNFI=.81 | Poor fit<br>Adequate fit<br>Poor fit             | Good (and adequate) criteria for adequate fit<br>CFI, NNFI ≥ .95 (≥ .90); RMSEA ≤ .06 (≤ .10); SRMR ≤ .05 (≤ .10) |
|                         | Adults practicing meditation<br>(n=211)          |                |            | 1F<br>6F<br>Second order (6>1)       | X <sup>2</sup> =4649.68, p<.001, RMSEA=.13, SRMR=.10, CFI=.64, NNFI=.61<br>X <sup>2</sup> =2629.61, p<.001, RMSEA=.10, SRMR=.08, CFI=.80, NNFI=.77<br>X <sup>2</sup> =3104.76, p<.001, RMSEA=.11, SRMR=.10, CFI=.77, NNFI=.73 | Poor fit<br>Acceptable<br>Poor fit               |                                                                                                                   |
|                         | Adults with major depressive disorder<br>(n=390) |                |            | 1F<br>6F<br>Second order (6>1)       | X <sup>2</sup> =3837.89, p<.001, RMSEA=.12, SRMR=.10, CFI=.63, NNFI=.59<br>X <sup>2</sup> =1673.59, p<.001, RMSEA=.08, SRMR=.06, CFI=.85, NNFI=.83<br>X <sup>2</sup> =2450.86, p<.001, RMSEA=.09, SRMR=.10, CFI=.77, NNFI=.74 | Poor fit<br>Acceptable fit<br>Poor fit           |                                                                                                                   |
| Lopez, 2015<br>[27]     | Community sample<br>(n=1643)                     | Dutch          | EFA        | 2F                                   | No model testing                                                                                                                                                                                                              | N/a                                              | N/a                                                                                                               |
|                         |                                                  |                | CFA<br>CFA | 6F<br>Second order (6>1)             | X <sup>2</sup> =3779.47, p<.001, RMSEA=.10, WRMR=3.15, CFI= 0.90, TLI=.88<br>Not reported                                                                                                                                     | Poor fit<br>Poor fit                             | Good (and adequate) fit:<br>CFI, TLI ≥ .95 (≥ .90); RMSEA ≤ .06 (≤ .08); WRMR ≤ 1.0                               |

## Factorial Validation of the Self Compassion Scale

|                         |                                             |            |      |                                |                                                                                                                                                                                                                                                                                                                                                                                                                                                            |                                        |                                                                                                |
|-------------------------|---------------------------------------------|------------|------|--------------------------------|------------------------------------------------------------------------------------------------------------------------------------------------------------------------------------------------------------------------------------------------------------------------------------------------------------------------------------------------------------------------------------------------------------------------------------------------------------|----------------------------------------|------------------------------------------------------------------------------------------------|
| Costa, 2015 [24]        | Mixed community and clinical sample (n=220) | Portuguese | CFA  | 2F<br>6F<br>Second order (6>1) | $X^2=738.88$ , $p<.000$ , $RMSEA=.07$ , $TLI=.87$ , $CFI=.88$<br>$X^2=597.60$ , $p<.000$ , $RMSEA=.07$ , $TLI=.87$ , $CFI=.88$<br>$X^2=885.58$ , $p<.000$ , $RMSEA=.10$ , $TLI=.75$ , $CFI=.78$                                                                                                                                                                                                                                                            | Acceptable fit<br>Poor fit<br>Poor fit | $CFI, TLI \geq .90$ ;<br>$RMSEA \leq .06$                                                      |
| Castilho, 2015 [21]     | Mixed clinical sample (n=316)               | Portuguese | CFA  | 6F<br>Second order (6>1)       | $X^2/df = 2.37$ , $p<.001$ , $RMSEA=.07$ , $TLI=.88$ , $CFI=.90$<br>$X^2/df = 2.98$ , $p<.001$ , $RMSEA=.08$ , $TLI=.91$ , $CFI=.94$                                                                                                                                                                                                                                                                                                                       | Adequate fit<br>Adequate fit           | $X^2/df > 2$ ; $CFI, TLI \geq .90$ ; $RMSEA \leq .10$                                          |
|                         | Mixed non-clinical sample (n=1128)          |            |      | 6F<br>Second order (6>1)       | $X^2/df = 5.91$ , $p<.001$ , $RMSEA=.07$ , $TLI=.91$ , $CFI=.92$<br>$X^2/df = 5.98$ , $p<.001$ , $RMSEA=.07$ , $TLI=.91$ , $CFI=.92$                                                                                                                                                                                                                                                                                                                       | Adequate fit<br>Adequate fit           |                                                                                                |
| Arimitsu, 2014 [22]     | General population (n=366)                  | Japanese   | CFA  | 1F                             | $X^2/df = 7.31$ , $RMSEA=.13$ , $CFI=.40$ , $NNFI=.35$                                                                                                                                                                                                                                                                                                                                                                                                     | Poor fit                               | $CFI \geq .95$ , $RMSEA \leq .06$                                                              |
|                         |                                             |            |      | 6F                             | $X^2/df = 2.61$ , $RMSEA=.07$ , $CFI=.86$ , $NNFI=.83$                                                                                                                                                                                                                                                                                                                                                                                                     | Poor fit                               |                                                                                                |
|                         |                                             |            |      | Second order (6>1)             | $X^2/df = 3.68$ , $RMSEA=.09$ , $CFI=.75$ , $NNFI=.73$                                                                                                                                                                                                                                                                                                                                                                                                     | Poor fit                               |                                                                                                |
|                         |                                             |            |      | Second order (6>2)             | $X^2/df = 2.68$ , $RMSEA=.07$ , $CFI=.85$ , $NNFI=.83$                                                                                                                                                                                                                                                                                                                                                                                                     | Poor fit                               |                                                                                                |
| Pfattheicher, 2017 [28] | Convenience sample (n=576)                  | English    | CFA  | 1F                             | $X^2=2645$ , $p<.001$ , $RMSEA=.12$ , $CFI=.77$ , $PCFI=.65$                                                                                                                                                                                                                                                                                                                                                                                               | Poor fit                               | $CFI > .90$ , $PCFI$ [cut off value not specified], $RMSEA < .08$ ,                            |
|                         |                                             |            |      | 2F                             | $X^2=1445$ , $p<.001$ , $RMSEA=.08$ , $CFI=.89$ , $PCFI=.75$                                                                                                                                                                                                                                                                                                                                                                                               | Poor fit                               |                                                                                                |
|                         |                                             |            |      | Second order (6>1)             | $X^2=1300$ , $p<.001$ , $RMSEA=.08$ , $CFI=.90$ , $PCFI=.75$                                                                                                                                                                                                                                                                                                                                                                                               | Poor fit                               |                                                                                                |
|                         |                                             |            |      | Second order (6>2)             | $X^2=959$ , $p<.001$ , $RMSEA=.06$ , $CFI=.93$ , $PCFI=.78$                                                                                                                                                                                                                                                                                                                                                                                                | Adequate fit                           |                                                                                                |
|                         |                                             |            |      | 6F                             | $X^2=826$ , $p<.001$ , $RMSEA=.06$ , $CFI=.95$ , $PCFI=.77$                                                                                                                                                                                                                                                                                                                                                                                                | Adequate fit                           |                                                                                                |
|                         |                                             |            | SEM  | 6F > 2F                        | $X^2=958.55$ , $RMSEA=.06$ , $CFI=.93$ , $\omega$ Positive factor=.95; $\omega$ Negative factor=.93                                                                                                                                                                                                                                                                                                                                                        | Adequate fit                           |                                                                                                |
| Brenner, 2017 [26]      | College students (n=1115)                   | English    | CFA  | 1F                             | $X^2=6396.59$ , $RMSEA=.14$ , $SRMR=.10$ , $CFI=.85$ , $NNFI=.81$ , $AIC= 6500.59$                                                                                                                                                                                                                                                                                                                                                                         | Poor fit                               | $CFI, NNFI \geq .95$ ,<br>$SRMR \leq .08$ , and<br>$RMSEA \leq .06$ .<br>$6 < \Delta AIC > 10$ |
|                         |                                             |            |      | 2F                             | $X^2=2070.34$ , $RMSEA=.07$ , $SRMR=.06$ , $CFI=.96$ , $NNFI=.94$ , $AIC= 2176.34$                                                                                                                                                                                                                                                                                                                                                                         | Adequate fit                           |                                                                                                |
|                         |                                             |            |      | 3F                             | $X^2=6552.39$ , $RMSEA=.14$ , $SRMR=.10$ , $CFI=.84$ , $NNFI=.81$ , $AIC= 6662.39$                                                                                                                                                                                                                                                                                                                                                                         | Poor fit                               |                                                                                                |
|                         |                                             |            |      | 6F                             | $X^2=1332.52$ , $RMSEA=.06$ , $SRMR=.05$ , $CFI=.97$ , $NNFI=.96$ , $AIC= 1466.52$                                                                                                                                                                                                                                                                                                                                                                         | Adequate fit                           |                                                                                                |
|                         |                                             |            |      | Second order (6>1)             | $X^2=2156.57$ , $RMSEA=.08$ , $SRMR=.10$ , $CFI=.95$ , $NNFI=.94$ , $AIC= 2272.57$                                                                                                                                                                                                                                                                                                                                                                         | Adequate fit                           |                                                                                                |
|                         |                                             |            |      | Second order (6>2)             | $X^2=1537.59$ , $RMSEA=.06$ , $SRMR=.05$ , $CFI=.97$ , $NNFI=.95$ , $AIC= 1659.59$                                                                                                                                                                                                                                                                                                                                                                         | Adequate fit                           |                                                                                                |
|                         |                                             |            |      | Bifactor (6>1)                 | $X^2=1995.72$ , $RMSEA=.08$ , $SRMR=.13$ , $CFI=.96$ , $NNFI=.94$ , $AIC= 2151.72$                                                                                                                                                                                                                                                                                                                                                                         | Adequate fit                           |                                                                                                |
|                         |                                             |            |      | Bifactor (6>2) <sup>c</sup>    | $X^2=1244.36$ , $RMSEA=.06$ , $SRMR=.17$ , $CFI=.98$ , $NNFI=.96$ , $AIC= 1400.36$<br>- General Self compassion ( $\omega H=.84$ , $PRV=.92$ , $ECV=.75$ ); SK ( $\omega HS=.18$ , $PRV=.21$ ); CH ( $\omega HS=.27$ , $PRV=.35$ ); MF ( $\omega HS=.02$ , $PRV=.03$ );<br>- General Self coldness ( $\omega H=.88$ , $PRV=.94$ , $ECV=.68$ ); SJ ( $\omega HS=.12$ , $PRV=.15$ ); IL ( $\omega HS=.12$ , $PRV=.15$ ); OI ( $\omega HS=.18$ , $PRV=.20$ ); | Adequate fit                           |                                                                                                |
| Tóth-Király, 2016 [25]  | Online sample (n=505)                       | Hungarian  | CFA  | 6F                             | $X^2=1755.66$ , $RMSEA=.10$ , $CFI=.85$ , $TLI=.82$                                                                                                                                                                                                                                                                                                                                                                                                        | Poor fit                               | Good (and adequate) fit: $CFI, TLI \geq .95$ ( $\geq .90$ ), $RMSEA \leq .06$ ( $\leq 0.08$ )  |
|                         |                                             |            |      | Bifactor (6>1)                 | $X^2=3025.58$ , $RMSEA=.14$ , $CFI=.71$ , $TLI=.66$                                                                                                                                                                                                                                                                                                                                                                                                        | Poor fit                               |                                                                                                |
|                         |                                             |            | ESEM | 6F<br>Bifactor (6>1)           | $X^2=509.92$ , $RMSEA=.06$ , $CFI=.97$ ; $TLI=.94$<br>$X^2= 482.85$ , $RMSEA=.06$ , $CFI=.97$ , $TLI=.95$ ,                                                                                                                                                                                                                                                                                                                                                | Adequate fit<br>Adequate fit,          |                                                                                                |

## Factorial Validation of the Self Compassion Scale

|                          |                                                           |                      |                    |                                                                                                   | - General Self compassion ( $\omega=.88$ , $\omega_H=.53$ ); Subscales ( $\omega_{HS}$ , $SK=.53$ , $CH=.72$ , $MF=.09$ , $SJ=.45$ , $IS=.24$ , $OI=.17$ ) | Good fit                                                                                           | $\Delta CFI \leq 0.010$ , $\Delta TLI \leq 0.010$ , and $\Delta RMSEA \leq 0.015$ .                                                                     |            |
|--------------------------|-----------------------------------------------------------|----------------------|--------------------|---------------------------------------------------------------------------------------------------|------------------------------------------------------------------------------------------------------------------------------------------------------------|----------------------------------------------------------------------------------------------------|---------------------------------------------------------------------------------------------------------------------------------------------------------|------------|
| Kotsou, 2016 [32]        | Online sample (n=1554)                                    | French               | CFA                | 6F                                                                                                | $X^2=1372$ , $p<.001$ , $X^2/df=4.95$ , $RMSEA=.05$ , $SRMR=.04$ , $CFI=.94$ , $TLI=.93$                                                                   | Good fit                                                                                           | Good (and adequate) fit: $CFI, TLI > .90$ ; $0 \leq SRMR \leq .05$ ( $.05 \leq SRMR \leq .10$ ) $0 \leq RMSEA \leq .05$ . ( $.05 \leq RMSEA \leq .08$ ) |            |
|                          |                                                           |                      |                    | Second order (6>1)                                                                                | $X^2=2284$ , $p<.001$ , $X^2/df=7.98$ , $RMSEA=.07$ , $SRMR=.07$ , $CFI=.88$ , $TLI=.89$                                                                   | Good fit                                                                                           |                                                                                                                                                         |            |
|                          |                                                           |                      |                    | Bifactor (6>1)                                                                                    | $X^2=1815$ , $p<.001$ , $X^2/df=6.23$ , $RMSEA=.06$ , $SRMR=.05$ , $CFI=.92$ , $TLI=.91$ , $\omega=.94$                                                    | Good fit                                                                                           |                                                                                                                                                         |            |
| deSouza, 2016 [33]       | Online sample (n=432)                                     | Brazilian Portuguese | CFA                | 6F                                                                                                | $X^2=895.90$ , $p<.001$ , $RMSEA=.07$ , $CFI=.94$ , $TLI=.93$                                                                                              | Good fit                                                                                           | $CFI, TLI \geq .90$<br>RMSEA [not reported]                                                                                                             |            |
|                          |                                                           |                      |                    | Second order (6>1)                                                                                | $X^2=1407.49$ , $p<.001$ , $RMSEA=.09$ , $CFI=.89$ , $TLI=.87$                                                                                             | Adequate fit                                                                                       |                                                                                                                                                         |            |
| Montero-Marín, 2016 [31] | Primary care professionals (Brazil: n=406) (Spain: n=414) | Brazilian Portuguese | CFA                | 1F                                                                                                | $X^2=2266.31$ , $p<.001$ , $X^2/df=7.58$ , $RMSEA=.13$ , $SRMR=.13$ , $CFI=.58$ , $AIC=2370.31$                                                            | Poor fit                                                                                           | Good (and adequate) fit: $X^2/df < 3$ ( $X^2/df < 5$ )                                                                                                  |            |
|                          |                                                           |                      |                    | Brazilian (Spanish) samples                                                                       |                                                                                                                                                            | $(X^2=2164.46$ , $p<.001$ , $X^2/df=7.24$ , $RMSEA=.12$ , $SRMR=.14$ , $CFI=.55$ , $AIC=2268.46$ ) |                                                                                                                                                         | Poor fit   |
|                          |                                                           |                      |                    |                                                                                                   | 2F                                                                                                                                                         | $X^2=675.07$ , $p<.001$ , $X^2/df=2.27$ , $RMSEA=.05$ , $SRMR=.07$ , $CFI=.84$ , $AIC=1179.86$     |                                                                                                                                                         | Poor fit   |
|                          |                                                           |                      |                    |                                                                                                   |                                                                                                                                                            | $(X^2=683.28$ , $p<.001$ , $X^2/df=2.29$ , $RMSEA=.05$ , $SRMR=.09$ , $CFI=.79$ , $AIC=1250.93$ )  |                                                                                                                                                         | Poor fit   |
|                          |                                                           |                      | Spanish            |                                                                                                   | 6F                                                                                                                                                         | $X^2=589.14$ , $p<.001$ , $X^2/df=2.07$ , $RMSEA=.05$ , $SRMR=.06$ , $CFI=.89$ , $AIC=947.65$      | Adequate fit                                                                                                                                            | lowest AIC |
|                          |                                                           |                      |                    |                                                                                                   |                                                                                                                                                            | $(X^2=582.14$ , $p<.001$ , $X^2/df=2.05$ , $RMSEA=.05$ , $SRMR=.08$ , $CFI=.86$ , $AIC=993.42$ )   | Adequate fit                                                                                                                                            |            |
|                          |                                                           |                      |                    |                                                                                                   | Second order (6>1)                                                                                                                                         | $X^2=699.29$ , $p<.001$ , $X^2/df=2.39$ , $RMSEA=.06$ , $SRMR=.14$ , $CFI=.78$ , $AIC=1439.11$     | Poor fit                                                                                                                                                |            |
|                          |                                                           |                      |                    |                                                                                                   |                                                                                                                                                            | $(X^2=692.16$ , $p<.001$ , $X^2/df=2.36$ , $RMSEA=.06$ , $SRMR=.14$ , $CFI=.76$ , $AIC=1385.50$ )  | Poor fit                                                                                                                                                |            |
|                          |                                                           |                      | Second order (6>2) | $X^2=858.12$ , $p<.001$ , $X^2/df=2.94$ , $RMSEA=.07$ , $SRMR=.07$ , $CFI=.88$ , $AIC=1067.87$    | Acceptable                                                                                                                                                 |                                                                                                    |                                                                                                                                                         |            |
|                          |                                                           |                      |                    | $(X^2=949.87$ , $p<.001$ , $X^2/df=3.25$ , $RMSEA=.07$ , $SRMR=.09$ , $CFI=.84$ , $AIC=1067.87$ ) | Poor fit                                                                                                                                                   |                                                                                                    |                                                                                                                                                         |            |
|                          |                                                           |                      | Second order       | $X^2=1237.71$ , $p<.001$ , $X^2/df=4.27$ , $RMSEA=.09$ , $SRMR=.12$ , $CFI=.80$ ,                 | Poor fit                                                                                                                                                   |                                                                                                    |                                                                                                                                                         |            |

## Factorial Validation of the Self Compassion Scale

|                                         |                                                                                                                                                                                 |                      |
|-----------------------------------------|---------------------------------------------------------------------------------------------------------------------------------------------------------------------------------|----------------------|
| (6>3[pos])                              | AIC=1359.71<br>( $X^2=1261.98$ , $p<.001$ , $X^2/df=4.35$ , RMSEA=.09, SRMR=.13, CFI=.76, AIC=1383.98)                                                                          | Poor fit             |
| 3F [pos]                                | $X^2=244.04$ , $p<.001$ , $X^2/df=3.94$ , RMSEA=.09, SRMR=.05, CFI=.91, AIC=302.04<br>( $X^2=285.73$ , $p<.001$ , $X^2/df=4.61$ , RMSEA=.09, SRMR=.06, CFI=.89, AIC=343.73)     | Good fit<br>Good fit |
| Second order<br>(3[pos]>1 [SCS<br>pos]) | $X^2=244.04$ , $p<.001$ , $X^2/df=3.94$ , RMSEA=.09, SRMR=.05, CFI=.91, AIC=302.04<br>( $X^2=285.73$ , $p<.001$ , $X^2/df=4.61$ , RMSEA=.09, SRMR=.06, CFI=.89, AIC=343.73)     | Good fit<br>Good fit |
| 3F [neg]                                | $X^2=233.31$ , $p<.001$ , $X^2/df=3.76$ , RMSEA=.08, SRMR=.06, CFI=.93, AIC=317.31<br>( $X^2=211.95$ , $p<.001$ , $X^2/df=3.42$ , RMSEA=.08, SRMR=.05, CFI=.91, AIC=295.95)     | Good fit<br>Good fit |
| Second order<br>(3[neg]>1 [SCS<br>neg]) | $X^2=164.09$ , $p<.001$ , $X^2/df=2.65$ , RMSEA=0.06, SRMR=.05, CFI=0.93, AIC=291.31<br>( $X^2=183.26$ , $p<.001$ , $X^2/df=2.96$ , RMSEA=.06, SRMR=.05, CFI=.91, AIC=269.95)   | Good fit<br>Good fit |
| Third order<br>(6>3[pos]>1 [SCS])       | $X^2=1237.71$ , $p<.001$ , $X^2/df=4.27$ , RMSEA=.09, SRMR=.12, CFI=.80, AIC=1359.71<br>( $X^2=1261.67$ , $p<.001$ , $X^2/df=4.35$ , RMSEA=.09, SRMR=.12, CFI=.76, AIC=1383.66) | Poor fit<br>Poor fit |
| Bifactor (6>1)                          | $X^2=1171.22$ , $p<.001$ , $X^2/df=4.29$ , RMSEA=.09, SRMR=.13, CFI=.81, AIC=1327.22<br>( $X^2=1056.42$ , $p<.001$ , $X^2/df=3.87$ , RMSEA=.08, SRMR=.11, CFI=.81, AIC=1212.42) | Poor fit<br>Poor fit |

*Note.* CFA = confirmatory factor analysis; SEM = structural equation modelling; ESEM = exploratory structural equation modelling; EFA = exploratory factor analysis; df = degrees of freedom; CFI = Comparative Fit Index; PCFI= parsimony adjusted CFI; TLI = Tucker-Lewis Index; RMSEA = root mean square error of approximation; SRMR = standardized root mean square residual; WRMR = weighted root mean residual; NNFI = non-normed fit index; AIC = Akaike's Information Criterion;  $\omega$ H = omega hierarchical;  $\omega$ HS = omega hierarchical subscale; PRV = proportion of reliable variance; ECV = explained common variance. SK = self-kindness, CH = common humanity, MF = mindfulness, SJ = self-judgment, IL = isolation, OI = over-identification;

1F = One-factor model encompassing all 26 SCS items;

2F = Two-factor model encompassing all positive and all negative items, respectively;

3F = Three-factor model reflecting three dimensions of SCS, SK versus SJ, SH versus IL, and MF versus OI;

3F [pos] = Three-factor model reflecting the positive SCS subscales (SK, CH, MF)

3F [neg] = Three -factor model reflecting the negative SCS subscales (SJ, IL, OI)

## Factorial Validation of the Self Compassion Scale

6F = Six-factor model corresponding to six SCS subscales;

Second order (6>1) = Hierarchical order model with six first order factors and one higher/second order factor;

Second order (6>2) = Hierarchical order model with six first order factors and two second/higher order factors;

Second order (6>3[pos]) = Hierarchical order model with six first order factors and three second/higher order factors, SK, CH, MF

Second order (3[pos]>1 [SCS pos]) = Hierarchical order model with three first order positive SCS factors (SK, CH, MF) and one second/higher order factor (self-compassion)

Second order (3[neg]>1 [SCS neg]) = Hierarchical order model with three first order negative SCS factors (SJ, IL, OI) and one second/higher order factor (self-criticism)

Third order (6>3[pos]>1 [SCS]) = Hierarchical order model with six first order factors (six SCS subscales), three second order factors (SK, CH, MF) and one third order factor (SCS)

Bifactor (6>1) = model with six group factors [SCS subscales] and one target/general factor [overall SCS].

<sup>†</sup>Model fit qualifiers phrased by current authors, but reflecting the evaluation of the model fit as reported in the original study; Good and Adequate fit = in agreement with a priori set criteria; Acceptable fit = somewhat below the a priori set criteria, but still judged as acceptable by the authors. The authors of the original studies differed in their choice of cut-offs and interpretation of their findings.
