# Supplementary material for: Structural validation of the Self-Compassion Scale with a German general population sample
Source: PubMed Central journal article supplement (PMC5800544; doi:10.1371/journal.pone.0190771), 2018-02-06
Supplement: pone.0190771.s003.pdf [file pone.0190771.s003.pdf]

## Factorial Validation of the Self-Compassion Scale

S 3: Factor Loadings and Confidence Intervals (CI) for the Six-factor Structure of the Self-Compassion Scale

| Item                              | Factor loading | 95% CI       |
|-----------------------------------|----------------|--------------|
| <b>SCS Self Kindness Factor</b>   |                |              |
| SCS 5                             | 0.66           | [0.64, 0.69] |
| SCS 12                            | 0.77           | [0.75, 0.79] |
| SCS 19                            | 0.66           | [0.63, 0.68] |
| SCS 23                            | 0.57           | [0.54, 0.59] |
| SCS 26                            | 0.76           | [0.74, 0.78] |
| <b>SCS Self Judgment Factor</b>   |                |              |
| SCS 1                             | 0.59           | [0.56, 0.62] |
| SCS 8                             | 0.56           | [0.53, 0.59] |
| SCS 11                            | 0.65           | [0.62, 0.67] |
| SCS 16                            | 0.77           | [0.75, 0.79] |
| SCS 21                            | 0.63           | [0.60, 0.66] |
| <b>SCS Common Humanity Factor</b> |                |              |
| SCS 3                             | 0.66           | [0.64, 0.69] |
| SCS 7                             | 0.63           | [0.60, 0.65] |
| SCS 10                            | 0.66           | [0.63, 0.69] |
| SCS 15                            | 0.66           | [0.63, 0.69] |
| <b>SCS Isolation Factor</b>       |                |              |
| SCS 4                             | 0.76           | [0.73, 0.78] |
| SCS 13                            | 0.65           | [0.62, 0.67] |
| SCS 18                            | 0.64           | [0.61, 0.67] |
| SCS 25                            | 0.76           | [0.74, 0.78] |

## Factorial Validation of the Self-Compassion Scale

### SCS Mindfulness Factor

|        |      |              |
|--------|------|--------------|
| SCS 9  | 0.74 | [0.71, 0.76] |
| SCS 14 | 0.75 | [0.73, 0.77] |
| SCS 17 | 0.71 | [0.69, 0.73] |
| SCS 22 | 0.67 | [0.65, 0.70] |

### SCS Over-identification Factor

|        |      |              |
|--------|------|--------------|
| SCS 2  | 0.71 | [0.68, 0.73] |
| SCS 6  | 0.72 | [0.70, 0.75] |
| SCS 20 | 0.60 | [0.57, 0.62] |
| SCS 24 | 0.59 | [0.57, 0.62] |

---
